# Supplementary material for: Uniform and well-dispersed GdVO4 hierarchical architectures: hydrothermal synthesis, morphology evolution, and luminescence properties
Source: Royal Society of Chemistry journal article supplement (doi:10.1039/c2ce25521a), 2012-01-01
Supplement: c2ce25521a.pdf [file c2ce25521a.pdf]

## **Uniform and well-dispersed GdVO<sub>4</sub> hierarchical architectures: Hydrothermal synthesis, Morphology Evolution, and luminescence properties**

**Zhenhe Xu,\*<sup>a</sup> Bin Feng,<sup>b</sup> Yu Gao,<sup>a</sup> Qian Zhao,<sup>a</sup> Di Sun,<sup>a</sup> Xin Gao,<sup>a</sup> KelongLi,<sup>a</sup> Fu  
Ding,<sup>a</sup> Yaguang Sun\*<sup>a</sup>**

*<sup>a</sup>College of Applied Chemistry, Shenyang University of Chemical Technology, Shenyang, 100142,  
P.R. China*

*<sup>b</sup>Planning & Development Department, China National Aviation Fuel Group Corporation,  
Beijing, 100088, P.R. China*

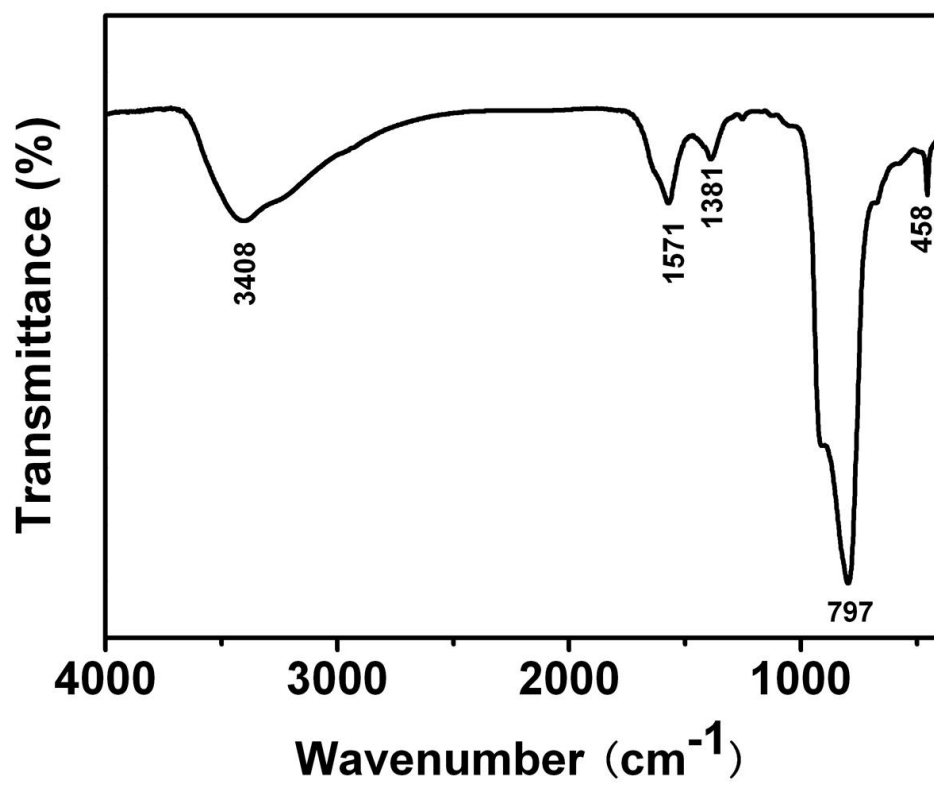

Fig. S1

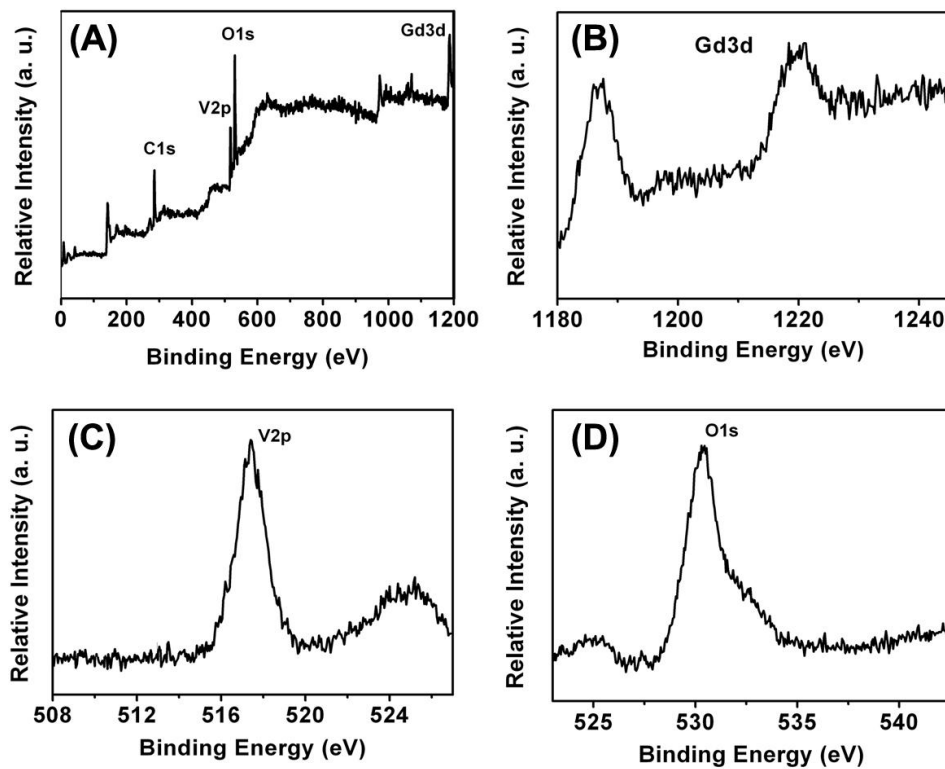

Fig. S2

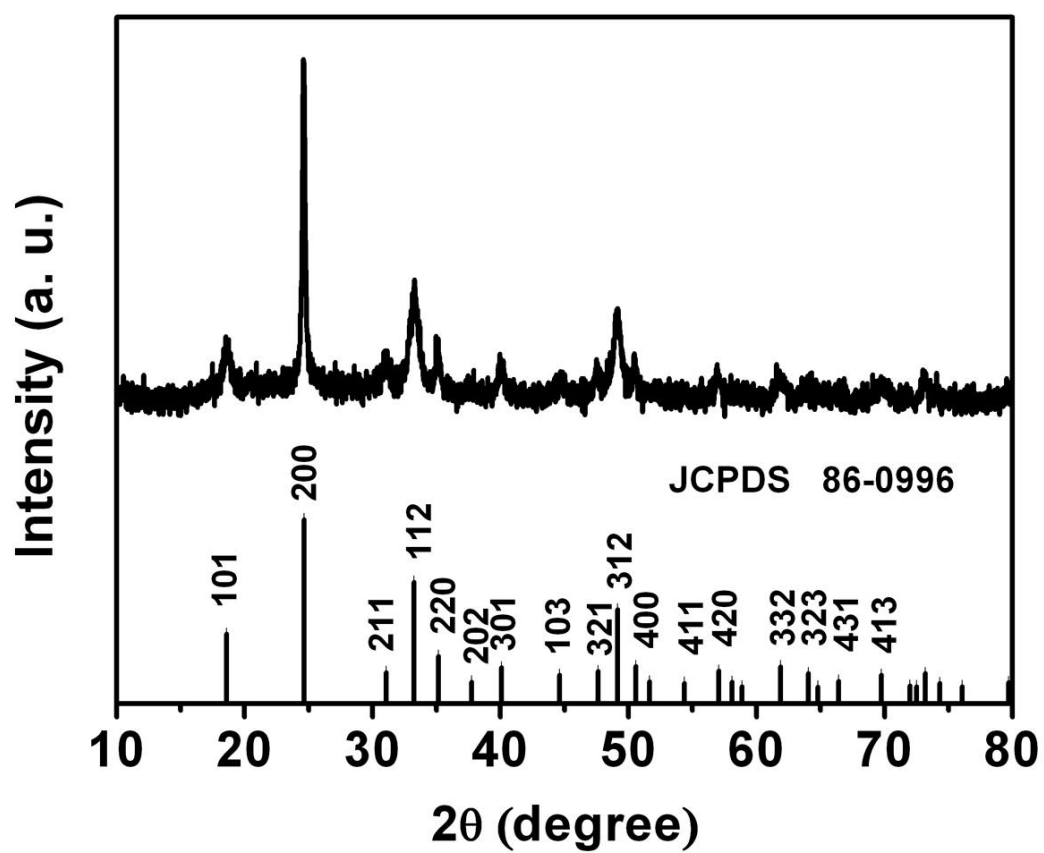

Fig. S3

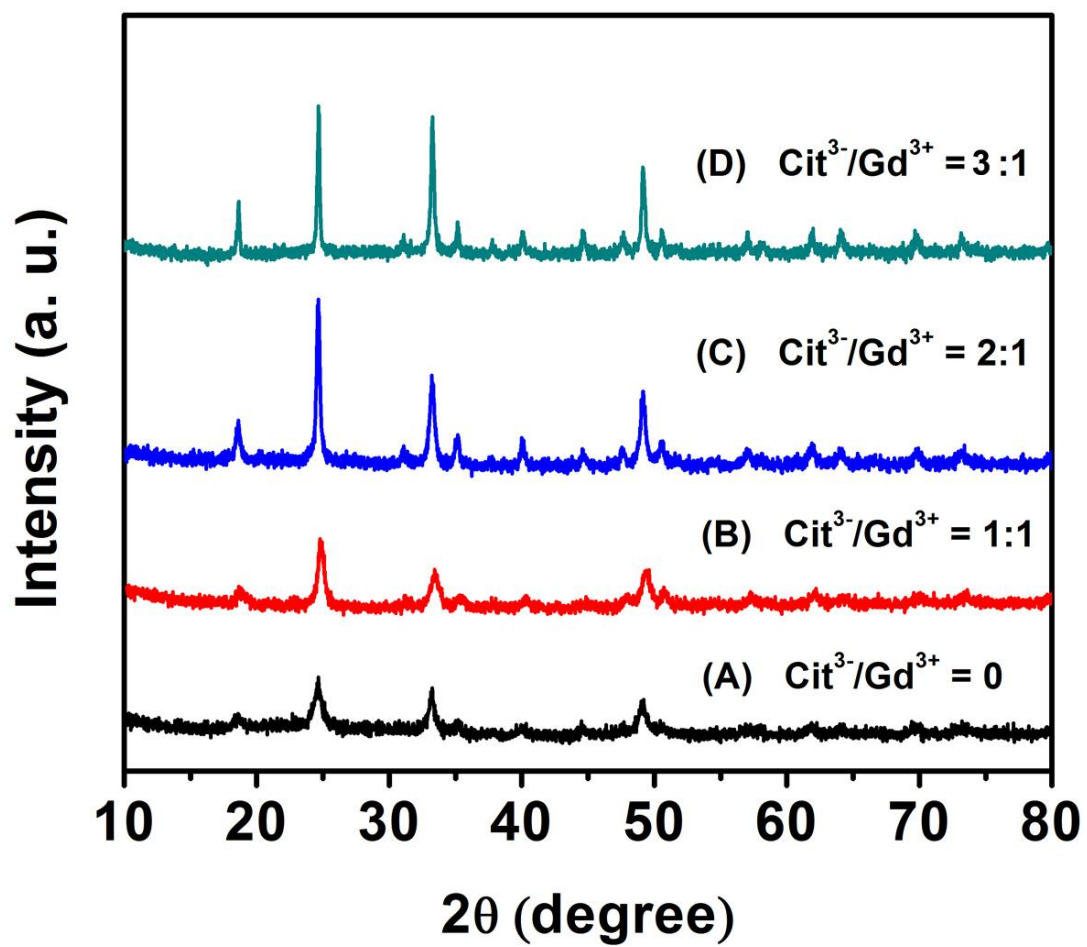

Fig. S4
